# Supplementary material for: Anomalous lateral diffusion of lipids during the fluid/gel phase transition of a lipid membrane
Source: Royal Society of Chemistry journal article supplement (doi:10.1039/d3cp04081j), 2023-01-01
Supplement: d3cp04081j1.pdf [file d3cp04081j1.pdf]

## Supporting Information for

# Anomalous Lateral Diffusion of Lipids during the Fluid/Gel Phase Transition of Lipid Membrane

Abhay Kumar, Snehasis Daschakraborty\*

Department of Chemistry, Indian Institute of Technology Patna, Bihar 801106, India.

### Corresponding Author

*Snehasis Daschakraborty*

Email: [\\*snehasis@iitp.ac.in](mailto:*snehasis@iitp.ac.in)

### CONTENTS

Figure S1. Voronoi diagram for membrane thickness  $T_L$

Figure S2. Voronoi diagram for area per lipid  $A_L$  at 305 and 310 K

Figure S3. Voronoi diagram of area per lipid  $A_L$  at 315 and 320 K

Figure S4. Voronoi diagram of area per lipid  $A_L$  at 323 and 350 K

Figure S5. Number density profiles of DPPC lipid

Figure S6. Radial distribution function and tilt angles

Table S1. Jump analysis parameters at different times at 315 K

Table S2. Jump analysis parameters at different times at 320 K

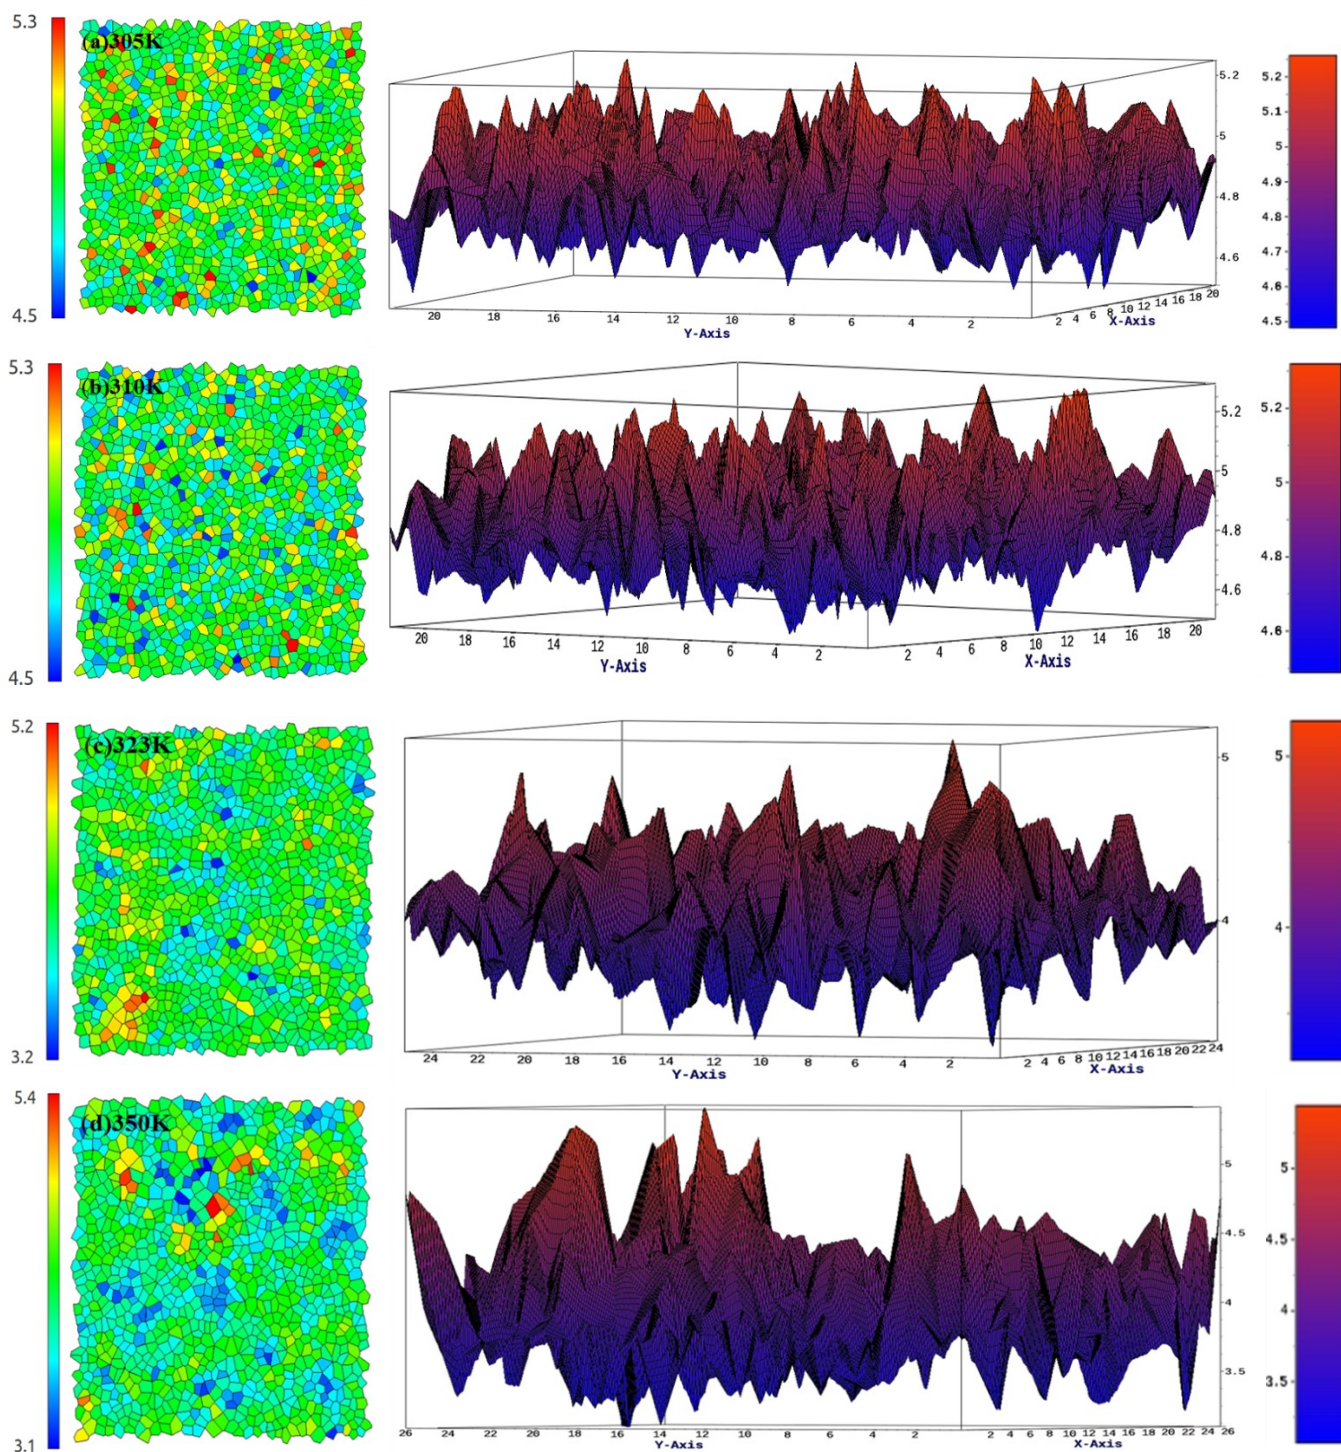

Figure S1. Voronoi diagram with corresponding 3D-plot of membrane thickness  $T_L$  for DPPC lipid at six temperatures out of four are there: (a) 305 K(gel), (b) 310 K(gel), (c) 323K(fluid) and (d) 350 K(fluid).

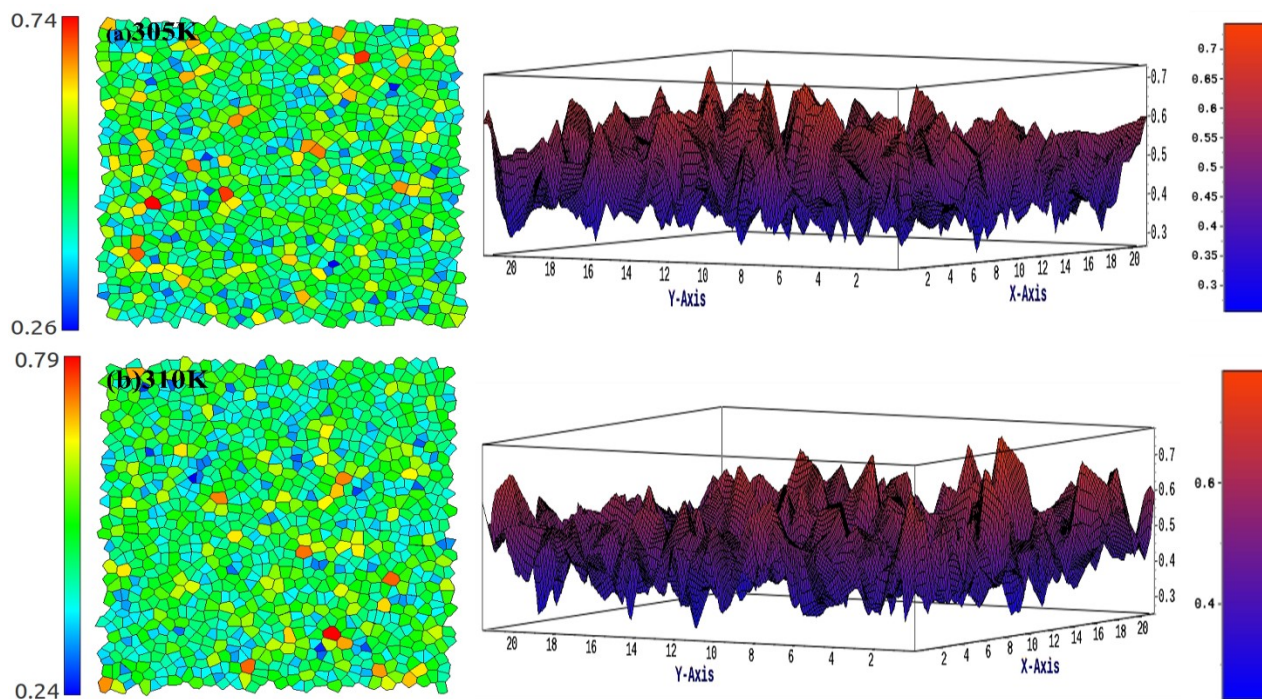

Figure S2. Voronoi diagram with corresponding 3D-plot of membrane area  $A_L(xy)$  for DPPC lipid at two temperatures: (a) 305 K(gel), (b) 310 K(gel).

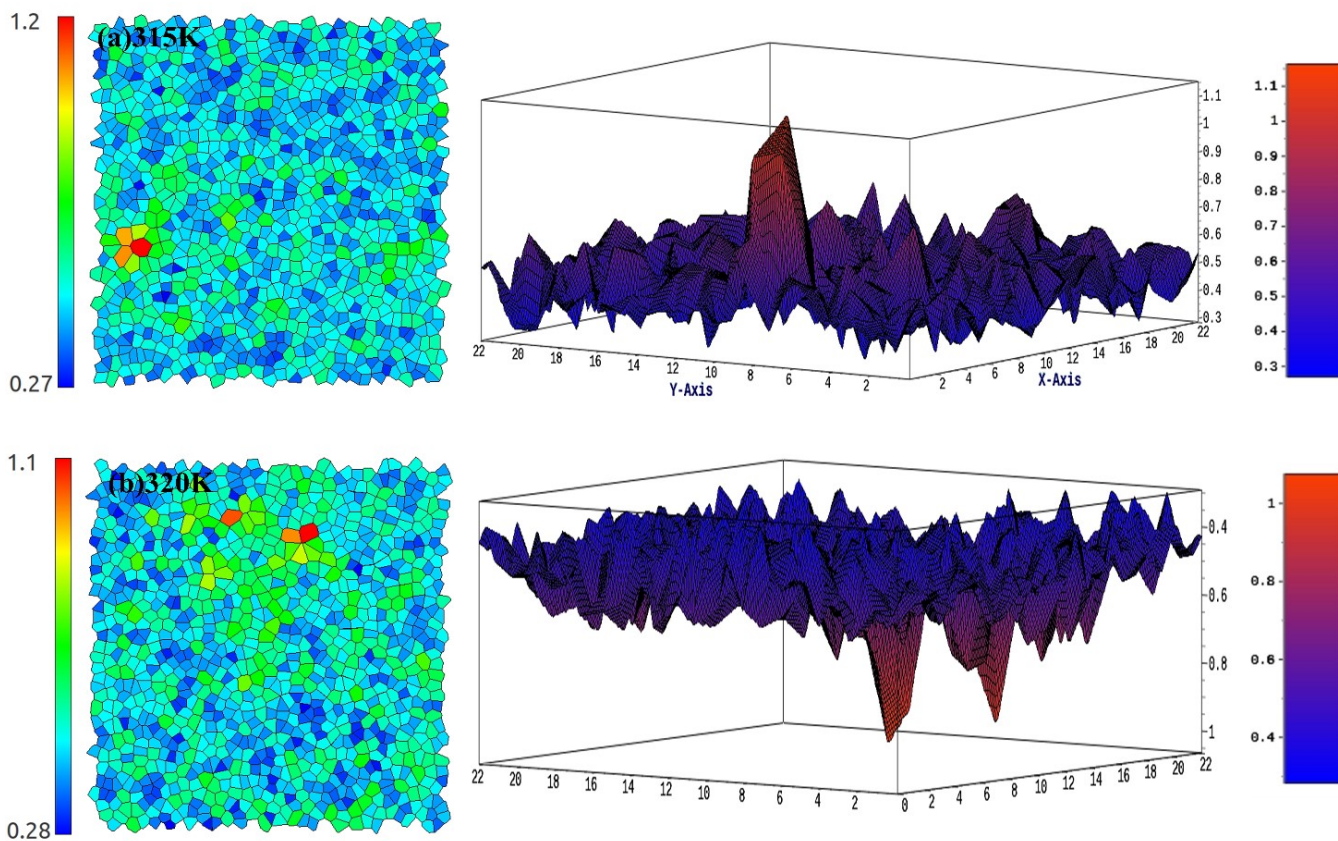

Figure S3. Voronoi diagram with corresponding 3D-plot of membrane area  $A_L(xy)$  for DPPC lipid at two temperatures: (a) 315 K(gel-fluid), (b) 320 K(gel-fluid) .

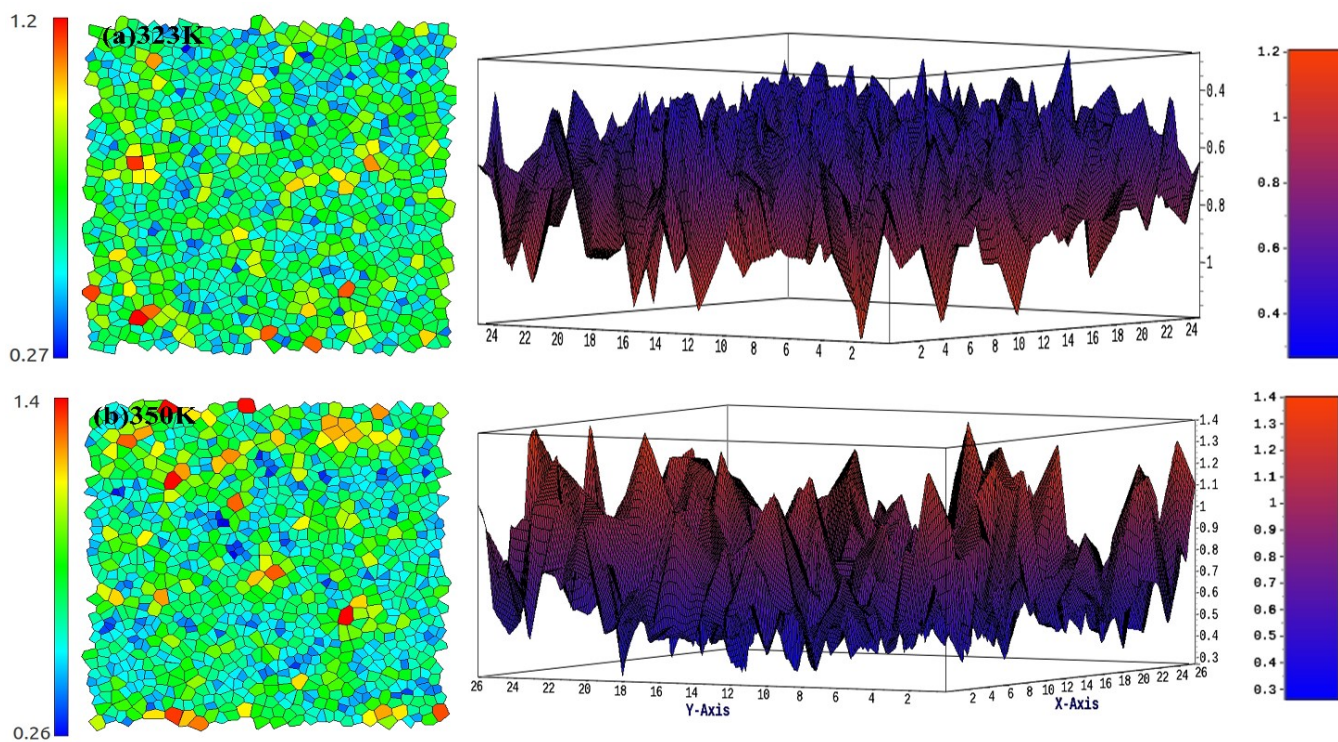

Figure S4. Voronoi diagram with corresponding 3D-plot of membrane area  $A_L(xy)$  for DPPC lipid at two temperatures: (a) 323K(fluid) and (b) 350 K(fluid).

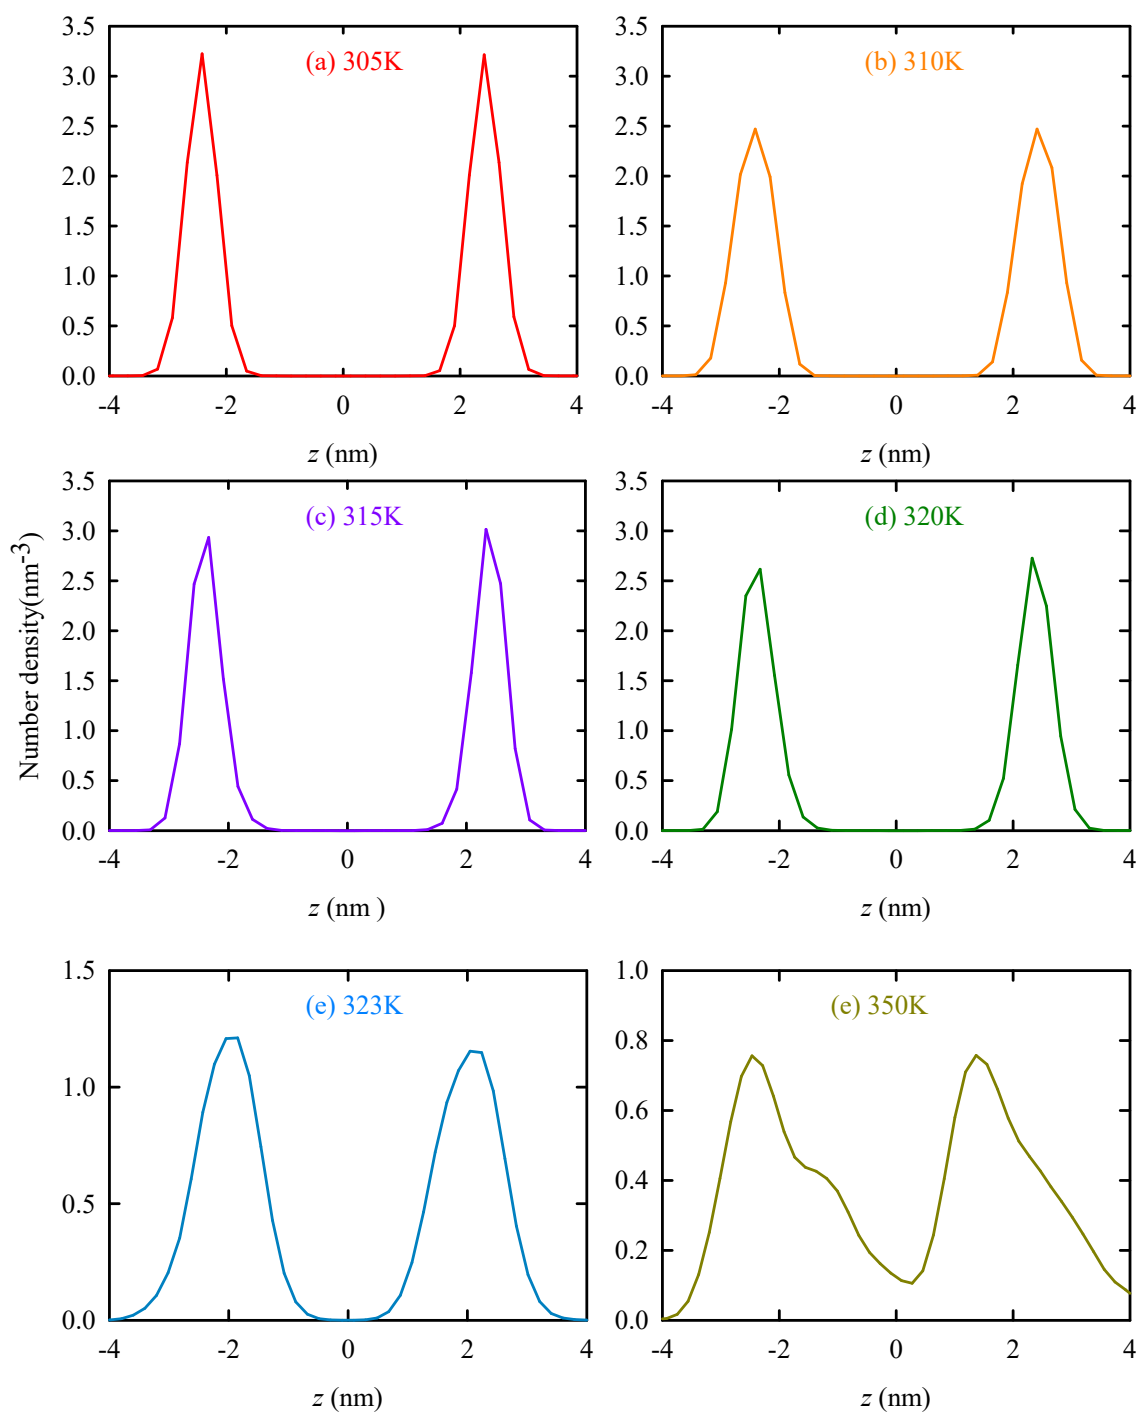

Figure S5. Number density profiles of DPPC lipid with phosphate group as the head group at all six temperatures.

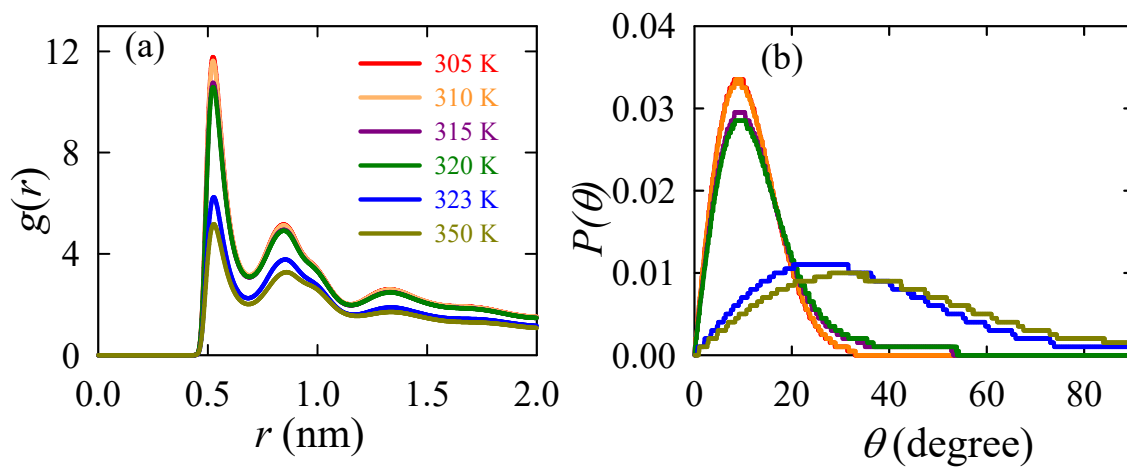

Figure S6. (a) The simulated radial distribution functions  $g(r)$ , and (b) the tilt angle distribution of DPPC lipid at six temperatures.

Table S1. Different jump parameters, obtained by analyzing the lipid dynamics using the TJD method considering seven different trajectory durations for DPPC lipid at 315 K. The parameters are as follows:  $n_{Jump}$  (the total number of jump occurrences analyzed here),  $P_{Jump}$  (percentage of jump-trajectory segments),  $\lambda_{Jump}^2$  (average square jump length),  $v_{Jump}$  (jump frequency),  $D_{Jump}$  (jump-diffusion coefficient),  $\chi_{Jump}$  (percentage contribution of jump-diffusion to the total diffusion).

| Jump parameters                      | 315K                   |                              |                         |                         |                         |                         |                         |
|--------------------------------------|------------------------|------------------------------|-------------------------|-------------------------|-------------------------|-------------------------|-------------------------|
|                                      | $\Delta t=50\text{ns}$ | $\Delta t=t^*(120\text{ns})$ | $\Delta t=200\text{ns}$ | $\Delta t=500\text{ns}$ | $\Delta t=1\mu\text{s}$ | $\Delta t=3\mu\text{s}$ | $\Delta t=5\mu\text{s}$ |
| $n_{Jump}$                           | 25473                  | 12249                        | 8095                    | 3897                    | 2113                    | 726                     | 424                     |
| $P_{Jump}$                           | 4.15                   | 4.78                         | 5.27                    | 6.34                    | 6.88                    | 7.09                    | 6.90                    |
| $\lambda_{Jump}^2(\text{nm}^2)$      | 5.37                   | 10.24                        | 14.65                   | 26.37                   | 38.97                   | 63.01                   | 76.95                   |
| $v_{Jump}/10^{-4}(\text{ns}^{-1})$   | 8.29                   | 3.99                         | 2.64                    | 1.27                    | 0.69                    | 0.24                    | 0.14                    |
| $D_{Jump}(\text{cm}^2\text{s}^{-1})$ | $1.11\times 10^{-8}$   | $1.02\times 10^{-8}$         | $0.97\times 10^{-8}$    | $0.84\times 10^{-8}$    | $0.67\times 10^{-8}$    | $0.37\times 10^{-8}$    | $0.27\times 10^{-8}$    |
| $\chi_{Jump}$                        | 88.80                  | 80.97                        | 76.52                   | 66.30                   | 53.14                   | 29.52                   | 21.05                   |
| $r_2(\text{nm})$                     | 1.81                   | 2.46                         | 2.96                    | 4.08                    | 5.14                    | 6.88                    | 7.64                    |

Table S2. Different jump parameters, obtained by analyzing the lipid dynamics using the TJD method considering seven different trajectory durations for DPPC lipid at 320 K.

| Jump parameters                      | 320K                   |                             |                         |                         |                         |                         |                         |
|--------------------------------------|------------------------|-----------------------------|-------------------------|-------------------------|-------------------------|-------------------------|-------------------------|
|                                      | $\Delta t=50\text{ns}$ | $\Delta t=t^*(74\text{ns})$ | $\Delta t=200\text{ns}$ | $\Delta t=500\text{ns}$ | $\Delta t=1\mu\text{s}$ | $\Delta t=3\mu\text{s}$ | $\Delta t=5\mu\text{s}$ |
| $n_{Jump}$                           | 27821                  | 19676                       | 8440                    | 3834                    | 1927                    | 706                     | 222                     |
| $P_{Jump}$                           | 4.53                   | 4.76                        | 5.49                    | 6.24                    | 6.27                    | 6.89                    | 3.61                    |
| $\lambda_{Jump}^2(\text{nm}^2)$      | 7.11                   | 9.63                        | 20.11                   | 35.80                   | 53.85                   | 88.19                   | 121.79                  |
| $v_{Jump}/10^{-4}(\text{ns}^{-1})$   | 9.06                   | 6.40                        | 2.75                    | 1.25                    | 0.63                    | 0.23                    | 0.07                    |
| $D_{Jump}(\text{cm}^2\text{s}^{-1})$ | $1.61\times 10^{-8}$   | $1.54\times 10^{-8}$        | $1.38\times 10^{-8}$    | 1.12                    | $0.84\times 10^{-8}$    | $0.51\times 10^{-8}$    | $0.22\times 10^{-8}$    |

|                  |       |       |       |       |       |       |       |
|------------------|-------|-------|-------|-------|-------|-------|-------|
|                  |       |       |       |       | 8     |       |       |
| $\chi_{Jump}$    | 76.66 | 73.44 | 65.81 | 53.21 | 40.23 | 24.14 | 10.48 |
| $r_2(\text{nm})$ | 2.10  | 2.43  | 3.56  | 4.88  | 6.17  | 8.06  | 9.74  |
